# Supplementary material for: In silico secretome analysis approach for next generation sequencing transcriptomic data
Source: PubMed Central journal article supplement (PMC3333173; doi:10.1186/1471-2164-12-s3-s14), 2011-11-30
Supplement: 1471-2164-12-S3-S14-S2.pdf [file 1471-2164-12-S3-S14-S2.pdf]

**Additional File 2: *In silico* secretome analysis approach for next generation sequencing transcriptomic data**

Gagan Garg and Shoba Ranganathan

**Table S2 -Represented KEGG pathways found in ES proteins predicted by KAAS**

| Pathway name                                 | Number of ES proteins represented |
|----------------------------------------------|-----------------------------------|
| Metabolic pathways                           | 109                               |
| Protein processing in endoplasmic reticulum  | 57                                |
| Ubiquitin mediated proteolysis               | 44                                |
| Wnt signalling pathway                       | 29                                |
| Glycolysis / Gluconeogenesis                 | 28                                |
| Spliceosome                                  | 28                                |
| Glutathione metabolism                       | 26                                |
| Circadian rhythm - mammal                    | 22                                |
| TGF- beta signalling pathway                 | 22                                |
| RNA transport                                | 20                                |
| Endocytosis                                  | 20                                |
| Purine metabolism                            | 19                                |
| Phagosome                                    | 19                                |
| Proteasome                                   | 18                                |
| Drug metabolism                              | 17                                |
| MAPK signaling pathway                       | 17                                |
| Lysosome                                     | 16                                |
| Arginine and proline metabolism              | 16                                |
| Pyrimidine metabolism                        | 15                                |
| Pyruvate metabolism                          | 15                                |
| Amino sugar and nucleotide sugar metabolism  | 14                                |
| Aminoacyl-tRNA biosynthesis                  | 13                                |
| Metabolism of xenobiotics by cytochrome P450 | 13                                |
| Valine, leucine and isoleucine degradation   | 13                                |
| Alanine, asparatate and glutamate metabolism | 12                                |
| Calcium signaling pathway                    | 12                                |
| Propanoate metabolism                        | 12                                |
| Phosphatidylinositol signaling system        | 11                                |
| mRNA surveillance pathway                    | 11                                |
| Pentose phosphate pathway                    | 10                                |
| Fructose and mannose metabolism              | 9                                 |
| RNA degradation                              | 9                                 |
| Arachidonic acid metabolism                  | 9                                 |
| Beta-Alanine metabolism                      | 9                                 |
| TCA cycle                                    | 9                                 |
| Glycerophospholipid metabolism               | 9                                 |
| Glycerolipid metabolism                      | 8                                 |
| Starch and sucrose metabolism                | 8                                 |
| Fatty acid metabolism                        | 8                                 |

|                                                        |   |
|--------------------------------------------------------|---|
| Oxidative phosphorylation                              | 7 |
| Hedgehog signaling pathway                             | 6 |
| Progesterone-mediated oocyte maturation                | 6 |
| ErbB signaling pathway                                 | 6 |
| Nucleotide excision repair                             | 6 |
| Nitrogen metabolism                                    | 6 |
| Galactose metabolism                                   | 6 |
| Tryptophan metabolism                                  | 5 |
| Histidine metabolism                                   | 5 |
| DNA replication                                        | 5 |
| Valine, leucine and isoleucine biosynthesis            | 5 |
| Inositol phosphate metabolism                          | 5 |
| Basal transcription factors                            | 5 |
| Lysine degradation                                     | 5 |
| Ribosome                                               | 5 |
| mTOR signaling pathway                                 | 4 |
| Taurine and hypotaurine metabolism                     | 4 |
| Ascorbate and aldarate metabolism                      | 4 |
| N-Glycan biosynthesis                                  | 3 |
| Cyanoamino acid metabolism                             | 3 |
| Jak-STAT signaling pathway                             | 3 |
| Glyoxylate and dicarboxylate metabolism                | 3 |
| Regulation of autophagy                                | 3 |
| Riboflavin metabolism                                  | 3 |
| Ribosome biogenesis in eukaryotes                      | 3 |
| Notch signaling pathway                                | 3 |
| Ether lipid metabolism                                 | 3 |
| Pentose and glucuronate interconversions               | 3 |
| Butanoate metabolism                                   | 3 |
| Base excision repair                                   | 3 |
| Peroxisome                                             | 3 |
| Other types of O-glycan biosynthesis                   | 2 |
| Sphingolipid metabolism                                | 2 |
| Fatty acid biosynthesis                                | 2 |
| Selenocompound metabolism                              | 2 |
| Drug metabolism – other enzymes                        | 2 |
| Porphyrin and chlorophyll metabolism                   | 2 |
| Cysteine and methionine metabolism                     | 2 |
| Sulfur relay system                                    | 2 |
| Mismatch repair                                        | 2 |
| Glycine, serine and threonine metabolism               | 2 |
| Other glycan degradation                               | 2 |
| RNA polymerase                                         | 1 |
| Glycosaminoglycan degradation                          | 1 |
| Nicotinate and nicotinamide metabolism                 | 1 |
| Lysine biosynthesis                                    | 1 |
| ECM-receptor interaction                               | 1 |
| Glycosylphosphatidylinositol (GPI)-anchor biosynthesis | 1 |

|                                                     |   |
|-----------------------------------------------------|---|
| Lipoic acid metabolism                              | 1 |
| Natural killer cell mediated cytotoxicity           | 1 |
| Dorso-ventral axis formation                        | 1 |
| Phenylalanine metabolism                            | 1 |
| Tyrosine metabolism                                 | 1 |
| Phenylalanine, tyrosine and tryptophan biosynthesis | 1 |
| D-Glutamine and D-glutamate metabolism              | 1 |
| Glycosphingolipid biosynthesis- ganglio series      | 1 |
