# Supplementary material for: In silico secretome analysis approach for next generation sequencing transcriptomic data
Source: PubMed Central journal article supplement (PMC3333173; doi:10.1186/1471-2164-12-s3-s14), 2011-11-30
Supplement: 1471-2164-12-S3-S14-S3.pdf [file 1471-2164-12-S3-S14-S3.pdf]

**Additional File 3: In silico secretome analysis approach for next generation sequencing transcriptomic data**

Gagan Garg and Shoba Ranganathan

Table S3- Represented KEGG BRITE objects found in ES proteins predicted by KAAS

| BRITE object                          | Number of ES proteins represented |
|---------------------------------------|-----------------------------------|
| Enzymes                               | 282                               |
| Spliceosome                           | 49                                |
| Chaperons and folding catalysts       | 44                                |
| Peptidases                            | 44                                |
| Protein kinases                       | 43                                |
| Ubiquitin system                      | 37                                |
| Chromosome                            | 34                                |
| Cytoskeleton proteins                 | 27                                |
| DNA repair and recombination proteins | 21                                |
| GTP-binding proteins                  | 19                                |
| Proteasome                            | 18                                |
| Transcription factors                 | 17                                |
| Ribosome biogenesis                   | 16                                |
| Translation factors                   | 11                                |
| DNA replication proteins              | 9                                 |
| Transporters                          | 8                                 |
| Glycan Binding proteins               | 7                                 |
| Cellular antigens                     | 7                                 |
| Glycosyltransferases                  | 6                                 |
| Secretion system proteins             | 5                                 |
| CAM ligands                           | 5                                 |
| Ion Channels                          | 4                                 |
| Ribosome                              | 4                                 |
| Bacterial motility proteins           | 3                                 |
| Lipid biosynthesis proteins           | 2                                 |
| Proteoglycans                         | 2                                 |
| Cytokines                             | 2                                 |
| Nuclear receptors                     | 1                                 |
| G protein-Coupled Receptors           | 1                                 |
| Cell adhesion molecules (CAMs)        | 1                                 |
