# Supplementary material for: In silico secretome analysis approach for next generation sequencing transcriptomic data
Source: PubMed Central journal article supplement (PMC3333173; doi:10.1186/1471-2164-12-s3-s14), 2011-11-30
Supplement: 1471-2164-12-S3-S14-S5.pdf [file 1471-2164-12-S3-S14-S5.pdf]

**Additional File 5: In silico secretome analysis approach for next generation sequencing transcriptomic data**

Gagan Garg and Shoba Ranganathan

**Table S5-Representative therapeutic targets set of *S. ratti* secretory proteins, homologous to *C. elegans* proteins with lethal RNAi phenotype and with no homologue in the host, rat.**

| No. | Cluster ID  | E value   | Identity (%) | Description from NR database                                                             | WBGene ID      | <i>C. elegans</i> homologue | <i>C. elegans</i> RNAi phenotype                            | <i>C. elegans</i> gene ontology                                                                                                                                                                                                                                                                 |
|-----|-------------|-----------|--------------|------------------------------------------------------------------------------------------|----------------|-----------------------------|-------------------------------------------------------------|-------------------------------------------------------------------------------------------------------------------------------------------------------------------------------------------------------------------------------------------------------------------------------------------------|
| 1   | Contig1034; | 1.00E-09  | 32.7         | UNC-34 [ <i>Caenorhabditis elegans</i> ]                                                 | WBGene00006770 | CE43197                     | cell migration variant, locomotion variant                  | CELLULAR COMPONENT<br>filopodium tip cell junction<br>actin cytoskeleton<br>BIOLOGICAL PROCESS<br>cell adhesion<br>cell migration<br>MOLECULAR FUNCTION<br>hormone activity<br>structural constituent of cell wall                                                                              |
| 2   | Contig1295; | 1.00E-21  | 56.63        | FK506-Binding protein family member (fkb-3) [ <i>Caenorhabditis elegans</i> ]            | WBGene00001428 | CE07921                     | dauer development variant                                   | CELLULAR COMPONENT<br>endoplasmic reticulum<br>BIOLOGICAL PROCESS<br>protein folding determination of adult life span                                                                                                                                                                           |
| 3   | Contig1718; | 2.00E-140 | 53.33        | Lin-5 (Five) interacting protein family member (lfi-1) [ <i>Caenorhabditis elegans</i> ] | WBGene00022500 | CE31264                     | embryonic lethal                                            | CELLULAR COMPONENT<br>kinetochore microtubule<br>MOLECULAR FUNCTION<br>transcription factor activity<br>sequence-specific DNA binding<br>protein dimerization activity<br>signal transducer activity<br>BIOLOGICAL PROCESS<br>regulation of transcription, DNA-dependent<br>signal transduction |
| 4   | Contig1740; | 4.00E-15  | 60.92        | Hypothetical protein [ <i>Brugia malayi</i> ]                                            | WBGene00001561 | CE34603                     | organism hypertonic lethality increased, ectopic expression | BIOLOGICAL PROCESS<br>filament organization                                                                                                                                                                                                                                                     |

|   |             |          |       |                                                                |                |         |                                                                                                                                                                                                                                                      |                                                                                                                                                                                                                                                                                                                                                 |
|---|-------------|----------|-------|----------------------------------------------------------------|----------------|---------|------------------------------------------------------------------------------------------------------------------------------------------------------------------------------------------------------------------------------------------------------|-------------------------------------------------------------------------------------------------------------------------------------------------------------------------------------------------------------------------------------------------------------------------------------------------------------------------------------------------|
|   |             |          |       |                                                                |                |         | transgene, multivulva, sterile, sick, larval lethal, maternal sterile, protruding vulva , pattern of transgene expression variant, receptor mediated endocytosis defective, lethal, embryonic lethal, slow growth, transgene expression increased    | hermaphrodite genitalia development<br>regulation of vulval development<br>CELLULAR COMPONENT<br>intermediate filament<br>MOLECULAR FUNCTION<br>structural constituent of cytoskeleton protein binding                                                                                                                                          |
| 5 | Contig1795; | 7.00E-21 | 49.12 | Hypothetical protein C01F1.1 [ <i>Caenorhabditis elegans</i> ] | WBGene00015296 | CE06742 | sterile, pattern of transgene expression variant, receptor mediated endocytosis defective protruding vulva, slow growth, age associated fluorescence increased ,embryonic lethal, reduced brood size, shortened life span, sterile, protruding vulva | MOLECULAR FUNCTION<br>RNA polymerase II transcription factor activity<br>CELLULAR COMPONENT<br>nucleus<br>BIOLOGICAL PROCESS<br>positive regulation of transcription<br>embryonic development<br>transcription initiation from RNA polymerase II promoter                                                                                       |
| 6 | Contig1865; | 1.00E-32 | 61.32 | Major sperm protein [ <i>Brugia malayi</i> ]                   | WBGene00006047 | CE09025 | transgene expression reduced                                                                                                                                                                                                                         | MOLECULAR FUNCTION<br>structural molecule activity                                                                                                                                                                                                                                                                                              |
| 7 | Contig2131; | 8.00E-17 | 53.57 | Myosin heavy chain, nonmuscle type 1 [ <i>Brugia malayi</i> ]  | WBGene00003776 | CE31177 | embryonic lethal, organism morphology variant, dumpy, locomotion variant, sterile progeny,, larval arrest                                                                                                                                            | BIOLOGICAL PROCESS<br>shape changes of embryonic cells nematode larval development<br>protein localization<br>signal transduction<br>body morphogenesis<br>collagen and cuticulin-based cuticle development<br>CELLULAR COMPONENT<br>contractile fiber<br>cell-cell adherens junction<br>myosin complex<br>MOLECULAR FUNCTION<br>motor activity |

|    |             |          |       |                                                                                                |                |         |                                                                                                       |                                                                                                                                                  |
|----|-------------|----------|-------|------------------------------------------------------------------------------------------------|----------------|---------|-------------------------------------------------------------------------------------------------------|--------------------------------------------------------------------------------------------------------------------------------------------------|
|    |             |          |       |                                                                                                |                |         |                                                                                                       | ATP binding                                                                                                                                      |
| 8  | Contig2153; | 3.00E-50 | 44.2  | C. briggsae CBR-TRY-10 protein [ <i>Caenorhabditis briggsae</i> ]                              | WBGene00045418 | CE41117 | fat content increased                                                                                 | CELLULAR COMPONENT<br>integral to membrane                                                                                                       |
| 9  | Contig2161; | 8.00E-17 | 71.19 | Triosephosphate isomerase [ <i>Caenorhabditis. elegans</i> ]                                   | WBGene00006601 | CE19040 | body wall muscle myosin organization defective, shortened life span                                   | MOLECULAR FUNCTION<br>triose-phosphate isomerase activity<br>BIOLOGICAL PROCESS<br>metabolic process                                             |
| 10 | Contig2465; | 2.00E-17 | 48.42 | Hypothetical protein F53B6.4 [ <i>Caenorhabditis elegans</i> ]                                 | WBGene00009959 | CE10896 | locomotion variant                                                                                    | MOLECULAR FUNCTION<br>structural molecule activity<br>CELLULAR COMPONENT<br>integral to membrane                                                 |
| 11 | Contig2583; | 9.00E-16 | 38.83 | Hypothetical protein CBG03803 [ <i>Caenorhabditis briggsae</i> ]                               | WBGene00009160 | CE32638 | cord commissures fail to reach target, ventral cord patterning variant, axon midline crossing variant | BIOLOGICAL PROCESS<br>protein amino acid phosphorylation<br>MOLECULAR FUNCTION<br>protein kinase activity<br>ATP binding<br>protein binding      |
| 12 | Contig2671; | 1.00E-23 | 53.27 | <i>Sperm-specific family, class P family member (ssp-10)</i> [ <i>Caenorhabditis elegans</i> ] | WBGene00006040 | CE09149 | transgene expression reduced, fat content increased                                                   | MOLECULAR FUNCTION<br>structural molecule activity                                                                                               |
| 13 | Contig2766; | 2.00E-52 | 53.42 | RE06140p [ <i>brugia malayi</i> ]                                                              | WBGene00011883 | CE03683 | larval arrest, slow growth, embryonic lethal, small, clear, embryonic lethal                          | BIOLOGICAL PROCESS<br>positive regulation of growth rate<br>embryonic development ending in birth or egg hatching<br>nematode larval development |
| 14 | Contig29;   | 2.00E-09 | 29.55 | Hypothetical protein CBG18079 [ <i>Caenorhabditis briggsae</i> ]                               | WBGene00015049 | CE06688 | fat content reduced                                                                                   | MOLECULAR FUNCTION<br>protein kinase activity<br>ATP binding<br>BIOLOGICAL PROCESS<br>protein amino acid phosphorylation                         |
| 15 | Contig2903; | 6.00E-15 | 27.12 | TsJ5 [ <i>Trichinella spiralis</i> ]                                                           | WBGene00019510 | CE18030 | transgene induced cosuppression variant, slow growth, embryonic                                       | MOLECULAR FUNCTION<br>nucleotide binding                                                                                                         |

|    |             |           |       |                                                                                      |                |         |                                                                                                                                                                                                                                                                                                                                      |                                                                                                                                                              |
|----|-------------|-----------|-------|--------------------------------------------------------------------------------------|----------------|---------|--------------------------------------------------------------------------------------------------------------------------------------------------------------------------------------------------------------------------------------------------------------------------------------------------------------------------------------|--------------------------------------------------------------------------------------------------------------------------------------------------------------|
|    |             |           |       |                                                                                      |                |         | lethal                                                                                                                                                                                                                                                                                                                               | BIOLOGICAL PROCESS<br>positive regulation of growth rate<br>embryonic development<br>ending in birth or egg hatching                                         |
| 16 | Contig2930; | 3.00E-33  | 48.82 | Hypothetical protein Bm1_55970 [ <i>Brugia malayi</i> ]                              | WBGene00016015 | CE25784 | transgene expression increased, maternal sterile, protruding vulva,slow growth, embryonic lethal, maternal sterile                                                                                                                                                                                                                   | BIOLOGICAL PROCESS<br>embryonic development<br>ending in birth or egg hatching<br>positive regulation of growth rate hermaphrodite genitalia development     |
| 17 | Contig506;  | 8.00E-13  | 37.29 | Hypothetical protein F53B6.4 [ <i>Caenorhabditis elegans</i> ]                       | WBGene00009959 | CE10896 | locomotion variant                                                                                                                                                                                                                                                                                                                   | MOLECULAR FUNCTION<br>structural molecule activity<br>CELLULAR COMPONENT<br>integral to membrane                                                             |
| 18 | Contig858;  | 2.00E-13  | 46.15 | Predicted: upstream activation factor subunit spp27 – like [ <i>Apis mellifera</i> ] | WBGene00020779 | CE37993 | embryonic lethal                                                                                                                                                                                                                                                                                                                     | CELLULAR COMPONENT<br>Nucleus<br>BIOLOGICAL PROCESS<br>embryonic development<br>ending in birth or egg hatching                                              |
| 19 | Contig914;  | 6.00E-127 | 64.65 | Hypothetical protein T19B10.2 [ <i>Caenorhabditis elegans</i> ]                      | WBGene00011831 | CE16413 | reduced brood size, age associated fluorescence increased, larval lethal, larval arrest, locomotion variant, paralyzed organism osmotic stress response variant, molt defect , shortened life span, slow growth, exploded through vulva, locomotion variant, transgene subcellular localization variant, protein aggregation variant | BIOLOGICAL PROCESS<br>locomotion<br>positive regulation of growth rate morphogenesis of an epithelium<br>molting cycle, collagen and cuticulin-based cuticle |
